# Supplementary material for: Tuning Mechanical Characteristics and Permeability of Alginate Hydrogel by Polyvinyl Alcohol and Deep Eutectic Solvent Addition
Source: MDPI journal article supplement (doi:10.3390/bioengineering11040371), 2024-04-12
Supplement: s1 [file s1]

Supplementary

# Tuning Mechanical Characteristics and Permeability of Alginate Hydrogel by Polyvinyl Alcohol and Deep Eutectic Solvent Addition

Tadej Menegatti <sup>1</sup>, Tilen Kopač <sup>1</sup> and Polona Žnidaršič-Plazl <sup>1,2,\*</sup>

<sup>1</sup> Faculty of Chemistry and Chemical Technology, University of Ljubljana, Večna pot 113, SI-1000 Ljubljana, Slovenia; tadej.menegatti@fkkt.uni-lj.si (T.M.); tilen.kopac@fkkt.uni-lj.si (T.K.)

<sup>2</sup> Chair of Micro Process Engineering and Technology—COMPETE, University of Ljubljana, Večna pot 113, SI-1000 Ljubljana, Slovenia

\* Correspondence: polona.znidarsic@fkkt.uni-lj.si

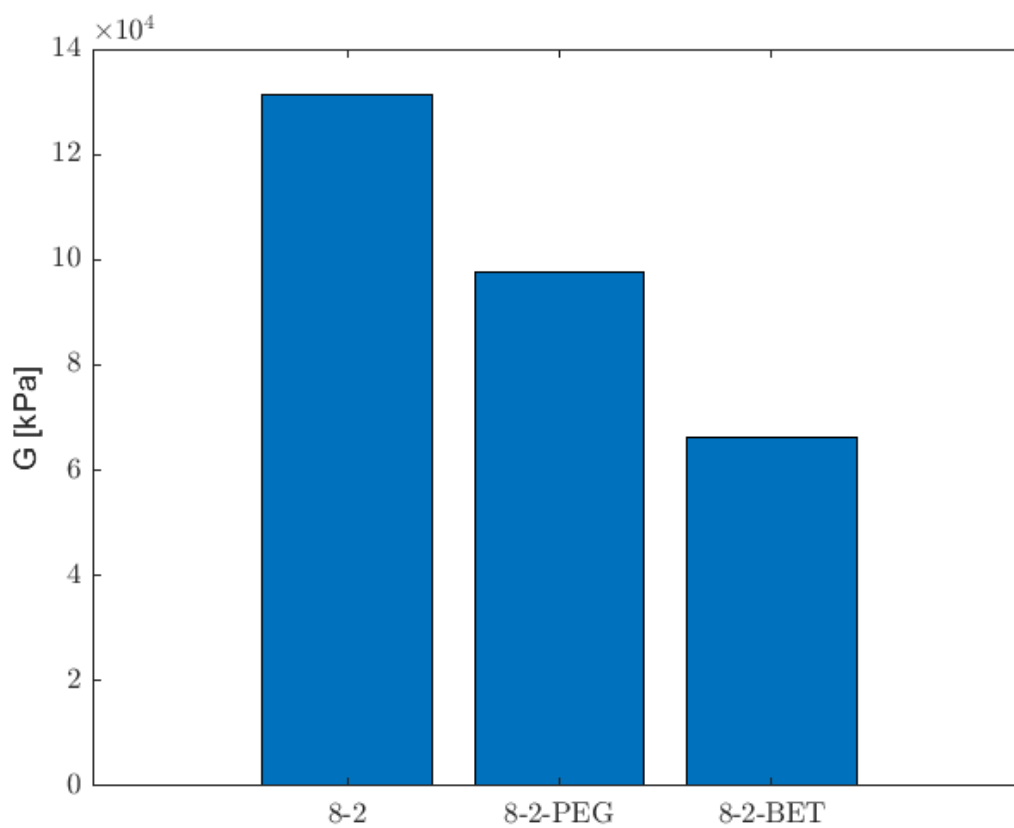

**Figure S1.** The shear modulus (G) of hydrogel samples 8-2 and its homologs with PEG and BET addition (20% (w/w)).

**Table S1.** Water content values of different hydrogel samples.

| Hydrogel Abbreviation | Water Content [%] |
|-----------------------|-------------------|
| Alg                   | 89.3              |
| 4-2                   | 85.5              |
| 8-2                   | 83.4              |
| 12-2                  | 81.8              |
| 8-2-30%               | 82.7              |
